# Supplementary material
Source: MDPI journal article supplement (https://www.mdpi.com/2038-8330/15/2/25)
Supplement: s1 [file s1]

**Supplementary Table S1. Foundation One Medicine genomic testing results and targeted therapy recommendations for all patients evaluated by the MTB, organized by malignancy type.**

| Diagnosis               | PD-L1   | MS      | TMB     | Genomic Findings                                                                                                  | Recommended Therapies & Trials                                                                                                    | Traditional Tx                                 | Targeted Tx                                                          | MTB date                 | VUS                                                                                                             |
|-------------------------|---------|---------|---------|-------------------------------------------------------------------------------------------------------------------|-----------------------------------------------------------------------------------------------------------------------------------|------------------------------------------------|----------------------------------------------------------------------|--------------------------|-----------------------------------------------------------------------------------------------------------------|
| AML                     | unknown | stable  | low (2) | no significant findings;<br>variants of unknown<br>significance only                                              | none                                                                                                                              |                                                |                                                                      | DOD 3/3/2020             | BLM<br>ERBB4<br>FHIT<br>FLYWCH1<br>IKBKE<br>MED12<br>MYST3<br>PLCG2<br>PTCH1<br>PTPN11<br>TET2<br>TP53<br>WDR90 |
| AML                     | unknown | stable  | low (0) | KRAS G12S<br>NRAS Q61R<br>ATRX W2139*<br>BLMY736fs*5<br>RUNX1-FPL22 fusion<br>RUNX1-MECOM fusion<br>WT1 V379fs*71 | Binimetinib<br>Cobimetinib<br>Trametinib<br>1 trial                                                                               | AML16<br>IDA-FLAG<br>Hydroxyurea<br>5/4/2020   | Trametinib<br>1/28/2020<br>Gilteritinib<br>2/19/2020<br>d/c 5/4/2020 | 2/1/2020<br>DOD 6/7/2020 | BLM<br>C11ORF30 (EMSY)<br>CHEK2<br>KMT2A (MLL)<br>MYD88<br>NTRK3<br>S1PR2<br>SETD2                              |
| AML                     | unknown | stable  | low (2) | CSF3R T618I                                                                                                       | Ruxolitinib<br>8 trials                                                                                                           |                                                |                                                                      |                          | CD22<br>FGF14<br>FOXO3<br>MED12<br>NCOR2<br>RICTOR<br>TSC1<br>TSC2<br>ZND217                                    |
| AML                     | unknown | unknown | low (3) | NUP214-ABL1 fusion<br>ATM R2598Q<br>CDKN2A p16IKN4a I49T<br>GATA1 splice site 220+1G>T<br>RUNX1 truncation exon 2 | Bosutinib<br>Dasatinib<br>Imatinib<br>Nilotinib<br>Ponatinib<br>4 trials<br>ATM:<br>Olaparib<br>Rucaparib<br>Niraparib<br>1 trial |                                                |                                                                      |                          |                                                                                                                 |
| AML                     | unknown | stable  | unknown | KMT2A (MLL-MLLT6 fusion)<br>KMT2C (MLL3)                                                                          | 10 clinical trials                                                                                                                |                                                |                                                                      |                          |                                                                                                                 |
| AML                     | unknown | stable  | low (1) | BRCA2<br>NPM1<br>KDM6A<br>PTPN11                                                                                  | BRCA2<br>Niraparib<br>Olaparib<br>Rucaparib<br>Talazoparib<br>1 trial<br>NPM1<br>10 trials                                        |                                                |                                                                      |                          |                                                                                                                 |
| Angiosarcoma            | **      | **      | low (3) | RAF1<br>AXIN1 A526V<br>PDCD1LG2 (PD-L2) R70H<br>PTPN6 H445fs*101<br>TP53 R248W                                    | Trametinib<br>Cobimetinib<br>Sorafenib<br>Regorafenib<br>4 trials                                                                 |                                                |                                                                      |                          |                                                                                                                 |
| Angiomyxoma             | 0%      | stable  | low (0) | APC loss                                                                                                          | none                                                                                                                              |                                                |                                                                      |                          |                                                                                                                 |
| B-ALL                   | 0%      | **      | **      | **sample failure**                                                                                                | **                                                                                                                                |                                                |                                                                      |                          |                                                                                                                 |
| Chordoma                | unknown | unknown | unknown | unable to reach pt for<br>consent for tissue - sample<br>failure on previous attempt                              |                                                                                                                                   |                                                |                                                                      |                          |                                                                                                                 |
| Chordoma                | 0%      | **      | **      | **sample failure**                                                                                                | **                                                                                                                                |                                                |                                                                      |                          |                                                                                                                 |
| Chordoma                | 0%      | **      | **      | **sample failure**                                                                                                | **                                                                                                                                |                                                |                                                                      |                          |                                                                                                                 |
| Colon<br>Adenocarcinoma | unknown | unknown | unknown | NF1 L2678_V2685>*<br>TP53 P80fs*43<br>MYST3<br>NOTCH2 G929fs*2<br>PRKAR1A V164fs*5                                | NF1<br>Cetuximab<br>Panitumumab<br>Tremetinib<br>5 trials<br>TP53<br>1 trial                                                      |                                                |                                                                      |                          | BRCA2<br>CSF1R<br>FGFR1<br>KDM5A<br>MRE11A<br>STK11                                                             |
| DLBCL                   | **      | **      | **      | **sample failure**                                                                                                | **                                                                                                                                |                                                |                                                                      |                          |                                                                                                                 |
| DSRCT                   | unknown | unknown | unknown | EWSR1-WT1 fusion<br>CD36 L360*                                                                                    | 4 trials                                                                                                                          | AEWS1031 EOT 2016                              |                                                                      |                          | EPHA5<br>GRP124<br>TSC2                                                                                         |
| DSRCT                   | unknown | unknown | low (3) | AKT3<br>EWSR1-WT1 fusion                                                                                          | Everolimus<br>Temsirolumis<br>8 trials                                                                                            | Salvage Chemo -<br>Temozolomide/<br>Irinotecan |                                                                      | DOD<br>2/15/2017         | CREBBP<br>CTNNA1<br>DNM2<br>FAF1<br>FAM123B<br>MLL3<br>MSH3<br>NOTCH2<br>NUP98<br>SYK<br>TCF3<br>WT1            |
| DSRCT                   | unknown | unknown | unknown | EWSR1-WT1 fusion<br>PRKAR1A loss                                                                                  | 4 trials                                                                                                                          |                                                |                                                                      |                          |                                                                                                                 |

| Diagnosis           | PD-L1   | MS      | TMB     | Genomic Findings                                                                            | Recommended Therapies & Trials                                                                                                        | Traditional Tx                 | Targeted Tx | MTB date         | VUS                                                                                                                                    |
|---------------------|---------|---------|---------|---------------------------------------------------------------------------------------------|---------------------------------------------------------------------------------------------------------------------------------------|--------------------------------|-------------|------------------|----------------------------------------------------------------------------------------------------------------------------------------|
| Ewing's Sarcoma     | unknown | unknown | unknown | EWSR1-FL11 fusion                                                                           | Everolimus<br>Temozolimus<br>5 trials                                                                                                 |                                |             | DOD<br>8/13/2016 |                                                                                                                                        |
| Ewing's Sarcoma     | 0%      | stable  | low (2) | EWSR1-FL11 fusion<br>TP63 T566M                                                             | 4 trials                                                                                                                              | AEWS0031 EOT<br>12/2019        |             |                  | CBL<br>EGFR<br>FANCL<br>HGF<br>KDM2B<br>LRP1B<br>MAP3K7<br>PDCD11<br>PLCG2<br>PTCH1<br>SETD2<br>SPEN                                   |
| Ewing's Sarcoma     | unknown | stable  | low (2) | RB1 loss                                                                                    | none                                                                                                                                  | VCR/Doxo/CTX<br>EOT 11/18/2019 |             |                  | CTEBP<br>DAXX<br>EPHA3<br>EPHB1<br>IGF1R<br>IRF8<br>KMT2C (MLL3)<br>MAF<br>MYO18A<br>NUP98<br>PTCH1<br>SETD2<br>SGK1                   |
| Ewing's Sarcoma     | 0%      | stable  | low (4) | CCND1<br>EWSR1-FL11 fusion (type 10/5)<br>CDKN2A/B p16INK4a loss and p14ARF loss exons 2-3  | Abemaciclib<br>Palbociclib<br>Ribociclib<br>11 trials                                                                                 |                                |             |                  | BCORL1<br>CPS1<br>HIST1H1C<br>KMT2A (MLL)<br>MAP3K1<br>MED12<br>MLH1<br>NCOR2<br>PTPN6<br>SETBP1<br>TSC1<br>TYK2                       |
| Ewing's Sarcoma     | unknown | stable  | low (4) | CCND1<br>CDK4<br>EWSR1-FL11 fusion (type 8/6)<br>CKS1B<br>EP300 P2310fs*44<br>MCL1<br>PDCD1 | CCND1<br>Abemaciclib<br>Palbociclib<br>Ribociclib<br>10 trials<br>CDK4<br>Palbociclib<br>Ribociclib<br>10 trials<br>EWSR1<br>7 trials |                                |             |                  | APH1A<br>AR<br>ARID1A<br>BCL11B<br>BLM<br>BRIP1<br>DOT1L<br>FGFR3<br>HSP90AA1<br>PLCG2<br>PTPN11<br>PTPN6<br>STAT6<br>YY1AP1<br>XNF703 |
| Ewing's Sarcoma     | 0%      | stable  | low (0) | EWSR1-FL11 fusion<br>CDKN2A/B loss<br>MYS13                                                 | 4 trials                                                                                                                              |                                |             |                  | CHEK2<br>FLYWCH1<br>IRS2<br>NOD1<br>PDGFRB<br>RELN<br>TSC1<br>ZNF703                                                                   |
| Ewing's Sarcoma     | 1%      | stable  | low (0) | EWSR1 (FL11 fusion; type 2)                                                                 | 5 trials                                                                                                                              |                                |             |                  | CRKL<br>EWSR1<br>KMT2C<br>PDGFRA I543T<br>SPEN<br>TSC1                                                                                 |
| Ewings, Recurrent   | 1%      | stable  | low (0) | EWSR1                                                                                       | 4 trials                                                                                                                              |                                |             | 12/1/2020        | ATM<br>ERG<br>MLL2<br>RELN<br>RUNX1                                                                                                    |
| Ewings, Recurrent   | 0%      | stable  | low (0) | EWSR1 (FL11 fusion)<br>CDKN2A/B loss<br>(Same results w/KCS)                                | 3 clinical trials                                                                                                                     |                                |             |                  | PRDM1<br>PRKDC<br>RNF43                                                                                                                |
| Fibrosarcoma        | unknown | unknown | unknown | ETV6 ETV6-NTRK3 fusion<br>DDKN2A p16INK4a R58*<br>and p14ARF P721L                          | 6 trials                                                                                                                              |                                |             |                  |                                                                                                                                        |
| Germ Cell Tumor     | unknown | unknown | unknown | KRAS G13D<br>TP53 R249S                                                                     | Trametinib<br>Cobimetinib<br>6 trials                                                                                                 |                                |             |                  |                                                                                                                                        |
| Glioma (brain)      | unknown | stable  | unknown | HGF<br>TCL1A<br>TP53                                                                        | 5 trials                                                                                                                              |                                |             |                  |                                                                                                                                        |
| Glomorus Tumor      | 1%      | stable  | low (2) | PDGFRB R561_E563>Q                                                                          | Sunitinib<br>3 trials                                                                                                                 |                                |             | 7/1/2021         | EPHA3<br>ERBB2<br>PCLO<br>PDCD11<br>SETD2<br>TSC1<br>FLYWCH1<br>ROS1<br>HNF1A<br>SETBP1                                                |
| Granular Cell Tumor | 0%      | stable  | low (2) | none                                                                                        | none                                                                                                                                  |                                |             |                  |                                                                                                                                        |

| Diagnosis                          | PD-L1   | MS      | TMB     | Genomic Findings          | Recommended Therapies & Trials                                                                                                                                      | Traditional Tx                 | Targeted Tx                                               | MTB date                                                                | VUS                                                                                   |
|------------------------------------|---------|---------|---------|---------------------------|---------------------------------------------------------------------------------------------------------------------------------------------------------------------|--------------------------------|-----------------------------------------------------------|-------------------------------------------------------------------------|---------------------------------------------------------------------------------------|
| HCC - Fibromellar                  | unknown | stable  | low (2) | CDKN1B A121fs*24<br>JAK3  | none                                                                                                                                                                |                                |                                                           |                                                                         | ARID1A<br>ATR<br>CIC<br>JAK3<br>RPTOR<br>SPTA1<br>ZNF217                              |
| Hepatoblastoma                     | 0%      | stable  | low (1) | CTNNB1 D32, S29F          | 10 trials                                                                                                                                                           | AHEP1531<br>EOT 3/1/3031       |                                                           |                                                                         | AXL<br>CREBBP<br>LRP1B<br>LRRK2<br>MAP3k1<br>MTOR<br>PDGFRA D444H                     |
| Hepatoblastoma                     | 0%      | stable  | low (2) | CTNNB1 G34V<br>TP53 N263D | 10 trials                                                                                                                                                           |                                |                                                           | 1/1/2020                                                                |                                                                                       |
| Histiocytic Malignancy             | 20%     | stable  | low (4) | SETD2                     | none                                                                                                                                                                |                                | Nivolumab<br>12/14/2020<br>Nivo + Ipilimumab<br>2/18/2021 | Aug 2020,<br>Oct 2020<br>March 2021<br>TCH Rare Tumor<br>Board May 2021 | BRIP1<br>DOT1L<br>EGFR<br>HDAC4<br>MCL1<br>MLL2<br>SMARCA1<br>WHSC1 (MMSET)           |
| Hodgkins Lymphoma                  | unknown | unknown | unknown | None                      | none                                                                                                                                                                | Clofarabine - 2 cycles         |                                                           |                                                                         |                                                                                       |
| Inflammatory Myofibroblastic Tumor | 50%     | stable  | low (1) | ALK TPM4-ALK fusion       | Brigatinib<br>Ceritinib<br>Crizotinib<br>Alectinib<br>Lorlatinib<br>10 trials                                                                                       |                                |                                                           | 6/1/2021                                                                | CUX1<br>IRS2<br>KDM6A<br>PRKDC<br>RNF43<br>SUZ12                                      |
| LCH                                | unknown | unknown | unknown | MAP2K1<br>TBL1XR1         | MAP2K1<br>Trametinib<br>Selumetinib<br>2 trials                                                                                                                     | Ara-C<br>Hydrocortisone        |                                                           |                                                                         | AXIN1<br>CIC<br>FBXW7<br>GNAS<br>KMT2C (MLL3)<br>MYO18A<br>TSC1                       |
| LCH                                | unknown | **      | **      | **sample failure**        | **                                                                                                                                                                  | LCH0115                        |                                                           |                                                                         |                                                                                       |
| LCH                                | unknown | **      | **      | BRAF R506_K507insLLR      | Trametinib<br>Selumetinib                                                                                                                                           | TXCH LCH0115<br>Cytarabine Arm |                                                           |                                                                         | ARID1A<br>CIC<br>ECT2L<br>FBX011<br>MAP3K1<br>MLL2<br>MYO18A<br>NKX2-1<br>SVK<br>TSC1 |
| LCH                                | failed  | failed  | failed  | BRAF                      | Binimetinib<br>Cobimetinib<br>Regorafenib<br>Selumetinib<br>Sorafenib<br>Trametinib<br>2 trials                                                                     |                                |                                                           | 11/1/2020                                                               |                                                                                       |
| LCH                                | unknown | stable  | low (0) | BRAF                      | Binimetinib<br>Cobimetinib<br>Dabrafenib<br>Encorafenib<br>Regorafenib<br>Selumetinib<br>Trametinib<br>Vemurafenib<br>3 trials                                      |                                |                                                           | 11/1/2020                                                               |                                                                                       |
| LCH                                | unknown | unknown | unknown | MAP2K1 (KCS only results) |                                                                                                                                                                     |                                |                                                           |                                                                         |                                                                                       |
| LCH                                | unknown | stable  | low (0) | BRAF V600E                | Dabrafenib<br>Dabrafenib +<br>Trametinib<br>Encorafenib +<br>Binimetinib<br>Regorafenib<br>Selumetinib<br>Trametinib<br>Vemurafenib<br>Vemurafenib +<br>Cobimetinib |                                |                                                           |                                                                         | C11ORF30 (EMSY)<br>MLL2<br>SPEN                                                       |
| LCH                                | unknown | stable  | low (0) | MAP2K1 (MEK1) Q56P        | Binimetinib<br>Cobimetinib<br>Trametinib<br>3 trials                                                                                                                |                                |                                                           | 3/1/2020                                                                |                                                                                       |
| LCH                                | unknown | stable  | low (1) | MAP2K1 (MEK1)<br>PASK     | MAP2K1 (MEK1)<br>Binimetinib<br>Cobimetinib<br>Selumetinib<br>Trametinib<br>2 trials                                                                                |                                |                                                           |                                                                         | APC<br>CRLF2<br>P2RY8                                                                 |

| Diagnosis                                           | PD-L1   | MS      | TMB              | Genomic Findings                                                                                          | Recommended Therapies & Trials                                                               | Traditional Tx                                                                                                            | Targeted Tx                                                      | MTB date                       | VUS                                                                                                              |
|-----------------------------------------------------|---------|---------|------------------|-----------------------------------------------------------------------------------------------------------|----------------------------------------------------------------------------------------------|---------------------------------------------------------------------------------------------------------------------------|------------------------------------------------------------------|--------------------------------|------------------------------------------------------------------------------------------------------------------|
| Leiomyosarcoma                                      | 0%      | stable  | low (2)          | PPFIBO1-ALK fusion<br>CD36 N53fs*24<br>CDKN2A/B loss                                                      | Entrectinib<br>Alectinib<br>Brigatinib<br>Ceritinib<br>Crizotinib<br>Lorlatinib<br>10 trials | Gemcitabine &<br>Taxotere (progressed<br>after 2 cycles)                                                                  | Ceritinib 3/2019;<br>progression<br>2/2020; Lorlatinib<br>3/2020 | 6/1/2019,<br>DOD<br>10/19/2020 |                                                                                                                  |
| Leiomyosarcoma                                      | 5%      | stable  | low (3)          | PPFIBP1-ALK fusion<br>CD36 N53fs*24<br>CDKN2A/B p16INK4a R80*<br>and p14ARF P94L -<br>subclonal loss      | Alectinib<br>Brigatinib<br>Ceritinib<br>Crizotinib<br>Lorlatinib<br>10 trials                |                                                                                                                           |                                                                  |                                |                                                                                                                  |
| Lung<br>Adenocarcinoma                              | 20%     | stable  | low (1)          | ROS1 SDC4-ROS1 fusion                                                                                     | Brigatinib<br>Ceritinib<br>Crizotinib<br>Entrectinib<br>Lorlatinib<br>10 trials              | benign                                                                                                                    |                                                                  |                                | ATRX<br>AXL<br>DDR2<br>EPHB4<br>PPP2R1A<br>PTCH1<br>RAD54L                                                       |
| Lymphoblastic<br>Leukemia/<br>Lymphoma              | unknown | stable  | low (2)          | CDKN2A/B CDKNEA loss<br>exon 1<br>CDKN2B loss exon 2<br>MTOR S2215Y<br>NT5C2 R367Q<br>PAX5-PTPLAD2 fusion | none                                                                                         |                                                                                                                           |                                                                  |                                |                                                                                                                  |
| Lymphoma,<br>lymph node<br>anaplastic large<br>cell | unknown | unknown | low (2)          | NPM1-ALK fusion<br>PIM1 amplification<br>STAG2 rearrangement exon<br>5                                    | Alectinib<br>Brigatinib<br>Ceritinib<br>Crizotinib<br>5 trials                               |                                                                                                                           |                                                                  |                                |                                                                                                                  |
| Malignant<br>Neoplasm                               | unknown | unknown | low (1)          | none                                                                                                      | none                                                                                         | ARST0531                                                                                                                  |                                                                  |                                | BRCA2<br>CRLF2<br>ECT2L<br>FAF1<br>MIB1<br>MSH3<br>NCOR2                                                         |
| Malignant<br>Peripheral Nerve<br>Sheath Tumor       | 0%      | stable  | intermediate (7) | NF1 splice site 4431-1G>A<br>CDKN2A/B loss<br>SUZ12 R196fs*15<br>TP53 R280K                               | Cobimetinib<br>Trametinib<br>9 trials                                                        |                                                                                                                           |                                                                  |                                | ATM<br>CTNNB1<br>DNM2<br>MAP3K6<br>ETV1<br>MSH2<br>MSH6<br>NFE2L2<br>NTRK1<br>RICTOR<br>ROS1                     |
| Medulloblastoma                                     | unknown | stable  | low (0)          | JAK1 R724L<br>MLL2 E1207fs*4                                                                              | none                                                                                         |                                                                                                                           |                                                                  |                                | FBXO11<br>GTSE1<br>LMO1<br>MYCN                                                                                  |
| Myofibroblastic<br>Tumor                            | 0%      | unknown | unknown          | ALK THBS1-ALK fusion                                                                                      | Alectinib<br>Brigatinib<br>Ceritinib<br>Crizotinib<br>Lorlatinib<br>Entrectinib<br>10 trials |                                                                                                                           |                                                                  |                                |                                                                                                                  |
| Osteosarcoma                                        | 0%      | stable  | unknown          | ARAF<br>C17orf39                                                                                          | Sorafenib<br>10 trials                                                                       | AOST0331 EOT<br>1/27/2020                                                                                                 |                                                                  | 7/1/2020                       | BRCA2<br>CEBPA<br>DDX3X<br>EGFR<br>FLCN<br>KDM6A<br>MAGED1<br>MAP2K4<br>MED12<br>MLL2<br>NOTCH2<br>RPTOR<br>SMC3 |
| Osteosarcoma                                        | unknown | unknown | unknown          | CDK4<br>RICTO<br>C17orf39<br>CCND3<br>KDM4C amplification<br>CDKN2A p16INK4a I49T<br>DAXX loss            | Palbociclib<br>Ribociclib<br>8 trials                                                        | Ifos/VP16<br>EOT 2013<br>Pazopanib (salvage)<br>5/2/2016<br>d/c 8/29/2016<br>Doxil x 6 cycles<br>Regorafenib<br>8/13/2018 | Palbociclib<br>8/8/2017 x1 yr                                    | DOD 2/8/2019                   |                                                                                                                  |

| Diagnosis    | PD-L1    | MS      | TMB               | Genomic Findings                                                                                                                                   | Recommended Therapies & Trials                                                                                                          | Traditional Tx | Targeted Tx | MTB date | VUS                                                                                                                                                            |
|--------------|----------|---------|-------------------|----------------------------------------------------------------------------------------------------------------------------------------------------|-----------------------------------------------------------------------------------------------------------------------------------------|----------------|-------------|----------|----------------------------------------------------------------------------------------------------------------------------------------------------------------|
|              |          |         |                   |                                                                                                                                                    |                                                                                                                                         |                |             |          | ABL1<br>APH1A<br>ATM<br>BIRC3<br>CBL<br>CHEK1<br>EGFR<br>ERG<br>GPR124<br>KMT2A (MLL)<br>LRRK2<br>PRKDC<br>RASGEF1A<br>RET<br>RUNX1<br>SDHD<br>SETBP1<br>U2AF1 |
| Osteosarcoma | 1%       | stable  | low (2)           | RET<br>MCL1<br>RAD21<br>TP53                                                                                                                       | 2 trials                                                                                                                                |                |             |          |                                                                                                                                                                |
| Osteosarcoma | unknown  | stable  | low (2)           | CDK8                                                                                                                                               | none                                                                                                                                    |                |             |          |                                                                                                                                                                |
|              |          |         |                   | AURKA<br>GNAS<br>LRP1B<br>RAD21<br>ZNF217                                                                                                          | 2 trials                                                                                                                                |                |             |          |                                                                                                                                                                |
| Osteosarcoma | 0%       | stable  | low (0)           |                                                                                                                                                    |                                                                                                                                         |                |             |          |                                                                                                                                                                |
|              |          |         |                   | CCNE1<br>RB1                                                                                                                                       |                                                                                                                                         |                |             |          |                                                                                                                                                                |
| Osteosarcoma | unknown  | stable  | intermediate (6)  | TP53                                                                                                                                               | none                                                                                                                                    |                |             |          |                                                                                                                                                                |
|              |          |         |                   | C17orf39<br>CCNE1<br>FLT1 S287F<br>RB1 splice site<br>2450_2489+76del116 - subclonal                                                               |                                                                                                                                         |                |             |          |                                                                                                                                                                |
| Osteosarcoma | low (1%) | unknown | low (1)           | TP53 rearrangement exon 2                                                                                                                          | none                                                                                                                                    |                |             |          |                                                                                                                                                                |
|              |          |         |                   | MYC duplication exons 2-3<br>C17orf39<br>CCNE1 amplification - equivocal<br>MAP2K4 rearrangement intron 6<br>RB1 A18fs*3<br>TP53 R248Q1            | 5 trials                                                                                                                                |                |             |          |                                                                                                                                                                |
| Osteosarcoma | 0%       | stable  | unknown           |                                                                                                                                                    |                                                                                                                                         |                |             |          |                                                                                                                                                                |
|              |          |         |                   | KDR<br>KIT<br>PDGFRA<br>AURKB<br>CCND3<br>TP53 R290L - subclonal                                                                                   | KDR:<br>Sunitinib<br>3 trials<br>KIT:<br>Imatinib<br>Nilotinib<br>Sorafenib<br>Sunitinib<br>8 trials<br>PDGFRA:<br>Imatinib<br>3 trials |                |             |          |                                                                                                                                                                |
| Osteosarcoma | 10%      | stable  | intermediate (12) |                                                                                                                                                    |                                                                                                                                         |                |             |          |                                                                                                                                                                |
|              |          |         |                   | SUFU A25fs*23<br>DNM2 rearrangement intron 19                                                                                                      | 4 trials                                                                                                                                |                |             |          |                                                                                                                                                                |
| Osteosarcoma | 0%       | stable  | low (3)           |                                                                                                                                                    |                                                                                                                                         |                |             |          |                                                                                                                                                                |
| Osteosarcoma | 0%       | **      | **                | **sample failure**                                                                                                                                 | **                                                                                                                                      |                |             |          |                                                                                                                                                                |
|              |          |         |                   | AKT2<br>AURKA<br>AXL<br>MYC<br>RICTOR<br>ARFRP1<br>C17orf39<br>CCNE1<br>CRKL<br>FGF10<br>GNAS<br>TP53 rearrangement intron 6                       | 17 trials                                                                                                                               |                |             |          |                                                                                                                                                                |
| Osteosarcoma | 0%       | stable  | low (3)           |                                                                                                                                                    |                                                                                                                                         |                |             |          |                                                                                                                                                                |
|              |          |         |                   | CDK4<br>AURKB<br>C17orf39<br>CCND3<br>IGF1R<br>NF2 loss exon 1<br>CDKN2A loss<br>CDKN2B loss exons 1-2<br>FHIT loss exon 5<br>LRP1B loss exons 4-7 | CDK4:<br>Palbociclib<br>Ribociclib<br>5 trials<br>NF2:<br>Everolimus<br>Temozolimus<br>10 trials                                        |                |             |          |                                                                                                                                                                |
| Osteosarcoma | unknown  | unknown | low (3)           |                                                                                                                                                    |                                                                                                                                         |                |             |          |                                                                                                                                                                |

| Diagnosis               | PD-L1    | MS      | TMB              | Genomic Findings                                                                                              | Recommended Therapies & Trials                                                                        | Traditional Tx                                                                                                                     | Targeted Tx | MTB date                     | VUS                                                                                                                |
|-------------------------|----------|---------|------------------|---------------------------------------------------------------------------------------------------------------|-------------------------------------------------------------------------------------------------------|------------------------------------------------------------------------------------------------------------------------------------|-------------|------------------------------|--------------------------------------------------------------------------------------------------------------------|
| Osteosarcoma            | 0%       | stable  | low (5)          | KIT<br>PDGFRA<br>BCL2L2<br>KDR<br>RB1 G310fs*8, inversion exon 8<br>TP53 splice site 993+1G>A                 | KIT<br>Sorafenib<br>Imatinib<br>Nilotinib<br>Sunitinib<br>10 trials<br>PDGFRA<br>Imatinib<br>2 trials |                                                                                                                                    |             |                              |                                                                                                                    |
| Osteosarcoma            | low (1%) | stable  | low (4)          | CDK4<br>BCL2L2<br>CCND3<br>GNAS<br>NFKBIA<br>FANCE truncation exon 10                                         | Palbociclib<br>Ribociclib<br>8 trials                                                                 |                                                                                                                                    |             |                              |                                                                                                                    |
| Osteosarcoma            | 0%       | stable  | low (3)          | C17orf399<br>CCNE1<br>TP52 R342*                                                                              | none                                                                                                  |                                                                                                                                    |             |                              |                                                                                                                    |
| Peritoneum Mesothelioma |          |         |                  | BCL2 H20Q                                                                                                     | 2 trials                                                                                              |                                                                                                                                    |             |                              |                                                                                                                    |
| Pre B-ALL               | 0%       | stable  | low (2)          | TP53 V272M                                                                                                    |                                                                                                       | AALL1131<br>Blinatumomab (d/c 5/4/2021)<br>Inatumomab                                                                              |             |                              |                                                                                                                    |
| RCC                     | 0%       | stable  | intermediate (7) | PIK3Ca E1037K<br>CDKN2A/B p16INK4a and p14ARF R122Q<br>KRI1-KEAP1 fusion<br>TP53 splice site 415_560-14del213 | Everolimus<br>Temsirolimus<br>10 trials                                                               |                                                                                                                                    |             | 7/1/2019                     |                                                                                                                    |
| RCC, recurrent          | 0%       | stable  | low (1)          | TFE3<br>CDK2NA/B loss<br>KDM5C loss                                                                           | TFE3<br>Carbozantinib<br>Sunitinib<br>10 trials                                                       |                                                                                                                                    |             | 8/1/2020                     |                                                                                                                    |
| Rhabdoid Tumor          | 0%       | stable  | low (6)          | SMARCB1 loss                                                                                                  | razemestostat<br>10 trials                                                                            |                                                                                                                                    |             | 6/1/2020                     |                                                                                                                    |
| Rhabdoid Tumor          | unknown  | unknown | unknown          | SMARCB1 truncation intron 2<br>MAP3K7N463S                                                                    | 4 trials                                                                                              |                                                                                                                                    |             | DOD<br>3/16/2016             | BRCA2<br>CDKN2A<br>CREBBP<br>MLL2<br>MYO18A<br>TSC2                                                                |
| RMS                     | unknown  | unknown | low (2)          | ASXL1-SBNO2 rearrangement<br>RB1 loss exons 2-27<br>TP53 T329fs*8<br>ZND703                                   | none                                                                                                  | ARST0331<br>ARST0921 EOT<br>10/2018                                                                                                |             |                              | APC<br>DOT1L<br>MLL2<br>MTOR                                                                                       |
| RMS                     | 0%       | stable  | low (4)          | CDK4<br>PAX3-FOXO1 fusion                                                                                     | Palbociclib<br>Ribociclib<br>10 trials                                                                | RMS13<br>ARST0921                                                                                                                  |             | 5/1/2020<br>DOD<br>2/19/2021 | ACTB<br>CCT6B<br>CUX1<br>JAK2<br>PBRM1<br>PCLO<br>PRDM1                                                            |
| RMS                     | low (1%) | stable  | low (3)          | BCOR P1258fs*36<br>NOTCH1<br>M1737_Y1738insPPPPAQL<br>HFM                                                     | none                                                                                                  | RMS13 - stopped<br>9/2019<br>ARST1431 - 12/2019;<br>NED 3 mon OT                                                                   |             |                              | BCORL1<br>GATA2<br>HDAC7<br>KEAP1<br>NOTCH1<br>SYK<br>WDR90                                                        |
| RMS                     | unknown  | unknown | unknown          | NF1 S1329*<br>MYC amplification<br>ETV6 truncation exon 5<br>SUZ12 splice site 917+1G>A<br>TP53 Q167_D184>H   | NF1:<br>Cobimetinib<br>Trametinib<br>4 trials<br>MYC:<br>3 trials                                     | ARST0331 (12/2015 - completed)<br>Relapse - ARST0921 (x2 cycles)<br>Progression<br>Salvage chemo<br>3/2016 (ifos/doxo)<br>ARST0332 |             | DOD<br>2/28/2017             | ATRX<br>AXL<br>CD36<br>FANCL<br>FHIT<br>MYST3<br>P2RY8<br>PAG1<br>PCLO<br>PIK3R1<br>POT1<br>PRKDC<br>RAD21<br>RELN |
| RMS, Alveolar           | 0%       | stable  | low (2)          | CDK4<br>PAX3-FOXO1 fusion                                                                                     | 10 trials                                                                                             |                                                                                                                                    |             |                              | BLM<br>CD36<br>DOT1L<br>FANCC<br>FANCF<br>FBXO11<br>FLT3<br>MTOR<br>PCLO<br>PLCG2<br>SETBP1<br>SPEN<br>STAT6       |

| Diagnosis      | PD-L1   | MS      | TMB              | Genomic Findings                                                              | Recommended Therapies & Trials                                                                                                                                        | Traditional Tx                      | Targeted Tx             | MTB date         | VUS                                                                                                                                                      |
|----------------|---------|---------|------------------|-------------------------------------------------------------------------------|-----------------------------------------------------------------------------------------------------------------------------------------------------------------------|-------------------------------------|-------------------------|------------------|----------------------------------------------------------------------------------------------------------------------------------------------------------|
| RMS, Embryonal | 0%      | stable  | low (3)          | NF1 loss exons 4-8<br>FGFR1<br>CDKN2A/B loss<br>MYST3<br>RAD21<br>ZNF703      | NF1<br>Selumetinib<br>Trametinib<br>16 trials                                                                                                                         | ARST0331                            |                         | 7/1/2021         | AR L254V<br>EBF1G501V<br>GPR124<br>MRE11A D131N<br>PAG1<br>PDGFRA E263A<br>PRKDC L3900V<br>RELN A150V<br>RUNX1T1<br>TNFAIP3T647P<br>TSC2 R1409W<br>TUSC3 |
| RMS, Embryonal | 10%     | stable  | low (2)          | MALT1<br>TP53                                                                 | none                                                                                                                                                                  |                                     |                         | 1/1/2021         | BCL6<br>CRLF2<br>FBXO11<br>HDAC4<br>IGF1R<br>LRP1B<br>MSH2<br>MSH6<br>PASK<br>SOX10<br>SYK<br>WDR90                                                      |
| RMS, recurrent | 0%      | stable  | low (0)          | CDK4<br>MDM2<br>FOXO1 (COL4A4 fusion)<br>FRS2<br>MYCL1<br>PAX3 (FOXO1 fusion) | CDK4:<br>10 trials<br>MDM2:<br>7 trials                                                                                                                               |                                     |                         |                  | BRCA2                                                                                                                                                    |
| Sarcoma        | 0%      | **      | **               | **sample failure**                                                            | **                                                                                                                                                                    |                                     |                         |                  |                                                                                                                                                          |
| Sarcoma        | 0%      | stable  | low (3)          | BCOR-CCNB3 fusion                                                             | none                                                                                                                                                                  | ARST1321                            |                         |                  | AR<br>MLH1                                                                                                                                               |
| Sarcoma        | unknown | unknown | unknown          | NF2 truncation intron 13<br>PASK R451*                                        | Everolimus<br>Temsirolimus<br>4 trials                                                                                                                                | ARST (VAC/VI)<br>progression 3/2018 | Pembrolizumab<br>3/2018 | DOD<br>8/11/2018 |                                                                                                                                                          |
| Sarcoma        | unknown | unknown | low (2)          | none                                                                          | none                                                                                                                                                                  |                                     |                         |                  | BRCA2<br>CHEK2<br>CSF1R<br>GTSE1<br>IRF4<br>MYST3<br>SMO                                                                                                 |
| Sarcoma        | 0%      | stable  | intermediate (6) | EGFR duplication exons 18-25<br>PIK3CA G1049R - subclonal<br>ARID1A M923fs*13 | EGFR:<br>Afatinib<br>Erlotinib<br>Gefitinib<br>Osimertinib<br>Cetuximab<br>Lapatinib<br>Panitumumab<br>7 trials<br>PIK3CA:<br>Temsirolimus<br>Everolimus<br>10 trials |                                     |                         |                  |                                                                                                                                                          |
| Sarcoma        | 30%     | stable  | low (2)          | PDGFRB R561C<br>PAX 5 loss<br>TNFAIP3 A586T                                   | PDGFR:<br>Sunitinib<br>1 trial                                                                                                                                        |                                     |                         | 8/1/2019         |                                                                                                                                                          |
| Sarcoma        | 0%      | stable  | low (1)          | EGFR duplication exons 18-25<br>CDKN2A/B loss<br>SDHA A437fs*45               | Afatinib<br>Dacomitinib<br>Erlotinib<br>Gefitinib<br>Osimertinib<br>8 trials                                                                                          |                                     |                         |                  |                                                                                                                                                          |
| Sarcoma        | 0%      | stable  | low (2)          | none                                                                          | none                                                                                                                                                                  |                                     |                         | 12/1/2020        | ARID2<br>ERBB2<br>EXOSC6<br>KMT2C(MLL3)<br>MED12<br>NTRK3<br>RELN<br>S1PR2<br>SPEN<br>TCF3<br>TSC2<br>TSHR                                               |
| Sarcoma        | unknown | stable  | low (2)          | NOTCH1 A2279V                                                                 | none                                                                                                                                                                  |                                     |                         |                  |                                                                                                                                                          |
| Sarcoma        | 0%      | stable  | low (2)          | BCOR-ITD                                                                      | none                                                                                                                                                                  |                                     |                         |                  |                                                                                                                                                          |
| Sarcoma        | 5%      | stable  | low (2)          | MYC<br>HMBOX1-NTRK3 fusion                                                    | 11 trials                                                                                                                                                             |                                     |                         |                  |                                                                                                                                                          |

| Diagnosis                | PD-L1   | MS     | TMB     | Genomic Findings                              | Recommended Therapies & Trials                                 | Traditional Tx        | Targeted Tx | MTB date  | VUS                                                                                                        |
|--------------------------|---------|--------|---------|-----------------------------------------------|----------------------------------------------------------------|-----------------------|-------------|-----------|------------------------------------------------------------------------------------------------------------|
| Soft Tissue Fibromatosis | 0%      | stable | low (0) | none                                          | none                                                           |                       |             |           | VUS<br>BRIP1<br>GNAS<br>IGF1R<br>JAK2<br>JAK3<br>ROS1                                                      |
| Soft Tissue Fibromatosis | 0%      | stable | low (4) | APC                                           | none                                                           |                       |             |           |                                                                                                            |
| Squamous Cell Carcinoma  | 10%     | stable | low (0) | INPP4B                                        | none                                                           |                       |             |           | AXIN1<br>FANCG<br>FGF19<br>FLT3<br>GSK3B<br>KDR<br>PTPRO<br>VHL                                            |
| Synovial Sarcoma         | 0%      | stable | low (1) | CDK4<br>SS18-SSX1 fusion<br>MUTYH G382D       | Palbociclib<br>Ribociclib<br>10 trials                         |                       |             |           |                                                                                                            |
| Synovial Sarcoma         | 0%      | stable | low (2) | SS18 SSX1 fusion                              | 1 trial                                                        |                       |             |           | ATRX E1464del<br>BRSK1 P764A<br>EP300 K1542E &<br>Q2268del<br>FAM123B P750S<br>MKI67 T2509M                |
| Synovial Sarcoma         | 0%      | stable | low (2) | SS18-SSX1 fusion                              | 1 trial                                                        |                       |             |           |                                                                                                            |
| Synovial Sarcoma         | 30%     | stable | low (0) | SS18-SSX2 fusion<br>KMT2C (MLL3)<br>V884fs*29 | NCT02638428 (SS18-SSX2)<br>NCT02389309 (SS18-SSX2)             |                       |             |           |                                                                                                            |
| T-ALL                    | unknown | stable | unknown | KRAS<br>CDKN2A/B<br>MET<br>U2AF1<br>NOTCH1    | KRAS<br>Selumetinib<br>Trametinib<br>1 trial                   |                       |             |           | AURKB<br>FGFR3<br>KEAP1<br>KMT2A (MLL)<br>MAP3K1<br>NTSC2<br>PCLO<br>SMARCA4<br>TSC1<br>WDR90              |
| Teratoma                 | unknown | stable | low (1) | U2AF1 R156H                                   | none                                                           |                       |             |           | BIRC3<br>BRCA1<br>CDH1<br>ICK<br>MLL2<br>MTOR<br>MYST3<br>PCLO<br>PLCG2<br>S1PR2<br>SOX10<br>STK11<br>TSC1 |
| Wilms                    | 0%      | stable | low (1) | CTNNB1 S45Y                                   | 10 trials                                                      | DD4A<br>EOT 6/26/2020 |             |           | ALK<br>CASP8<br>FUBP1<br>KMT2A (MLL)<br>RBM10<br>RNF43<br>TEK<br>TIPARP<br>TSC1                            |
| Wilms                    | 0%      | stable | low (1) | FBXW7<br>SPOP<br>TP53                         | FBXW7<br>Everolimus<br>Temsilolimus                            |                       |             | 9/6/2021  | CTNNB1<br>PCLO<br>LRP1B<br>ZNF703<br>MAP3K6<br>NOTCH1                                                      |
| Wilms                    | unknown | stable | low (4) | FAM123B R353*<br>TP53 C176_P177insC           | none                                                           |                       |             |           |                                                                                                            |
| Wilms                    | 0%      | stable | low (2) | BRCA1                                         | Niraparib<br>Olaparib<br>Rucaparib<br>Talazoparib<br>10 trials |                       |             | 3/21/2021 |                                                                                                            |
| Wilms                    | 0%      | stable | low (0) | POLE R1634H                                   | none                                                           |                       |             |           |                                                                                                            |
